# Supplementary material
Source: PubMed Central journal article supplement (PMC1782036)

A.

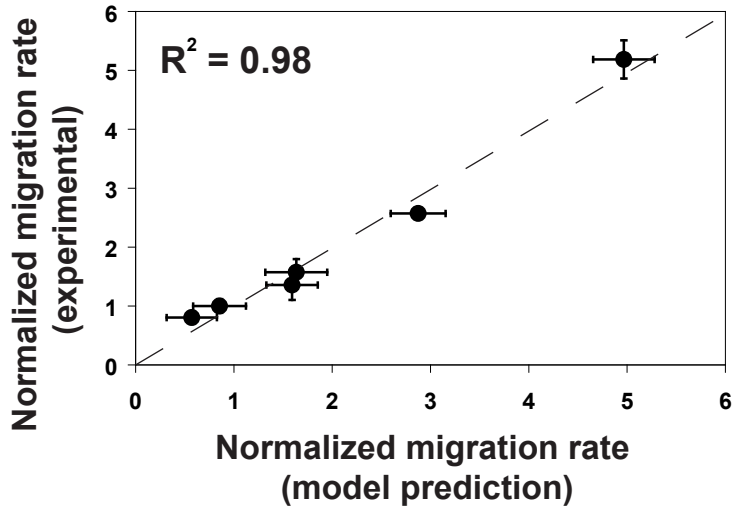

B.

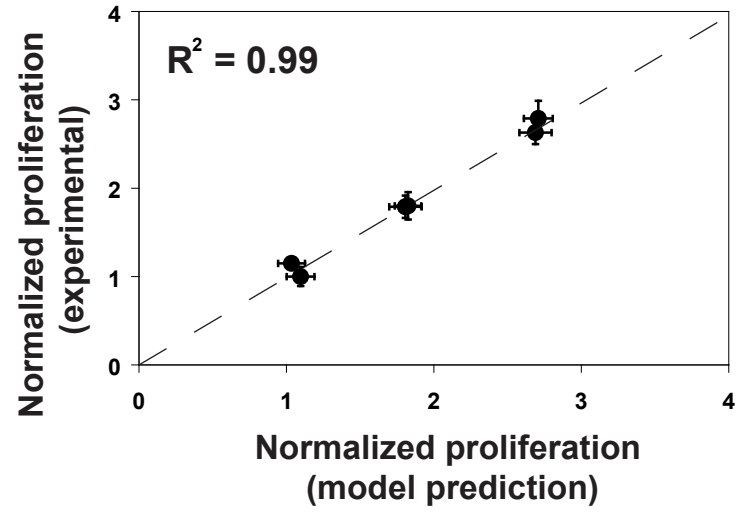

Supplement: pcbi.0030004.sg001.pdf [file pcbi.0030004.sg001.pdf]

A.

### Proliferation

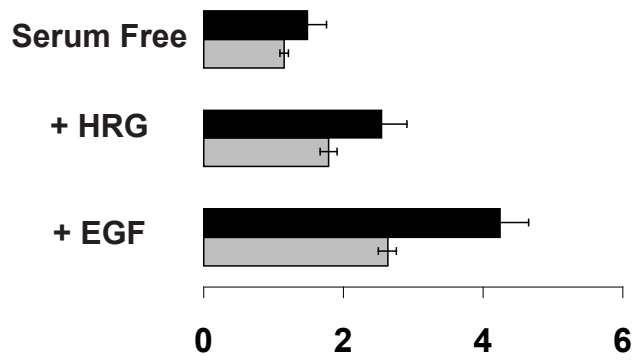

B.

### Migration

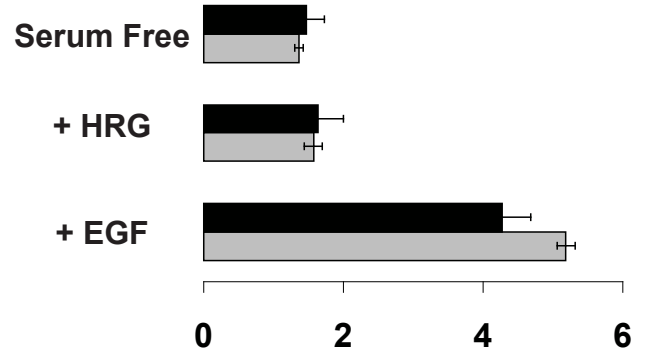

■ Experimental ■ Model

Supplement: pcbi.0030004.sg002.pdf [file pcbi.0030004.sg002.pdf]
